# Supplementary material for: Immediate vs Delayed Left Bundle Branch Block after Transcatheter Aortic Valve Replacement: Incidence and Risk Factors for Permanent Pacemaker Implantation
Source: Research Square preprint supplement (doi:10.21203/rs.3.rs-8121179/v1), 2025-12-01
Supplement: Supplementary file 2 [file ad105ecef200ad35a8d0db4f.docx]

**Supplementary Table. Clinical characteristics of patients with immediate and delayed LBBB with and without early PPI within 2 weeks**

|  | **Immediate LBBB** | | **p Value** | **Delayed LBBB** | | **p Value** |
| --- | --- | --- | --- | --- | --- | --- |
|  | **(n=247) *** | |  | **(n=32) *** | |  |
|  | **No PPI (n=216)** | **PPI (n=31)** |  | **No PPI (n=25)** | **PPI (n=7)** |  |
| Age (years) | 81.01±6.6 | 78.03±10.3 | 0.229 | 81.29±7.7 | 79.28±9.5 | 0.642 |
| Female sex (%) | 109 (50.5) | 15 (48.4) | 0.829 | 16 (64.0) | 1(14.3) | 0.033 |
| BMI (Kg/m2) | 27.8±5.2 | 27.1±4.8 | 0.538 | 29.7±4.8 | 30.2±5.1 | 0.774 |
| Diabetes Mellitus (%) | 95 (44.0) | 8 (25.8) | 0.055 | 10 (40.0) | 4 (57.1) | 0.669 |
| Hypertension (%) | 190 (88.0) | 22 (71.0) | 0.023 | 21 (84.0) | 7 (100.0) | 0.552 |
| Hyperlipidemia (%) | 158 (73.1) | 19 (61.3) | 0.171 | 20 (80.0) | 6 (85.7) | >0.99 |
| Chronic Renal Failure (%) | 48 (22.2) | 6 (19.4) | 0.718 | 3 (12.0) | 1 (14.3) | >0.99 |
| Atrial Fibrillation/Flutter (%) | 56 (25.9) | 9 (29.0) | 0.713 | 10 (40.0) | 3 (42.9) | >0.99 |
| Prior IHD (%) | 114 (52.8) | 13 (41.9) | 0.259 | 10 (40.0) | 5 (71.4) | 0.209 |
| Beta-blockers (%) | 129 (59.7) | 12 (38.7) | 0.027 | 18 (72.0) | 4 (57.1) | 0.648 |
| ACE inhibitors/ARB (%) | 136 (63.0) | 13 (41.9) | 0.025 | 13 (52.0) | 4 (57.1) | >0.99 |
| Amiodarone (%) | 28 (13.0) | 3 (9.7) | 0.776 | 3 (12.0) | 1 (14.3) | >0.99 |
| LVEF (%) | 55.6±7.9 | 55.6±7.7 | 0.882 | 56.8±6.4 | 57.8±5.6 | 0.755 |
| Aortic valve area (cm2) | 0.63±0.14 | 0.63±0.19 | 0.736 | 0.59±0.13 | 0.63±0.18 | 0.656 |
| Peak gradient (mmHg) | 80.5±24.6 | 86.5±27.9 | 0.079 | 80.2±25.2 | 74.5±13.06 | 0.688 |
| Mean gradient (mmHg) | 47.5±15.4 | 52±15.6 | 0.068 | 48±16.1 | 44.1±9.1 | 0.562 |
| Calcium score (HU) | 2406±1461 | 3358±2363 | 0.083 | 2440.7±1525 | 2490±1396 | 0.923 |
| **Procedural characteristics** |  |  |  |  |  |  |
| Trans femoral access | 215 (99.5) | 30 (96.8) | 0.236 | 25 (100.0) | 7 (100.0) |  |
| Valve mechanism (BEV/SEV) | 95 (44)/121 (56) | 11 (35.5)/20 (64.5) | 0.371 | 10 (40)/15(60) | 6 (85.7)/1 (14.3) | 0.083 |
| Valve size | 26.2±2.3 | 27.6±2.5 | 0.007 | 27.6±3.04 | 26.9±2.8 | 0.688 |
| Transient CAVB during TAVR | 10 (4.6) | 4 (12.9) | 0.082 | 1 (4.0) | 0 (0.0) | >0.99 |
| Transient QRS widening during TAVR | 0 (0) | 0 (0) | >0.99 | 6 (24) | 2 (28.6) | >0.99 |
| Temporary pacemaker | 158 (73) | 27 (87) | 0.12 | 4 (16) | 6 (86) | 0.001 |
| **In hospital post procedure events/ management** | |  |  |  |  |  |
| EPS | 25 (11.6) | 4 (12.9) | 0.77 | 5 (20) | 1 (14.3) | >0.99 |
| CAVB or HDAVB during hospitalization | 0 (0) | 22 (70.1) | <0.001 | 0 (0) | 5 (71.4) | <0.001 |
| Hospitalization time (days), median (IQR) | 4.5 (3-6) | 7 (3-8) | 0.49 | 6 (3-11) | 7 (6-8) | 0.47 |

AADs= anti arrhythmic drugs; ARB = angiotensin II receptor blocker; ACE = angiotensin converting enzyme; BEV = balloon-expandable valve; BMI = body mass index; CAVB = complete atrioventricular block; EPS = electrophysiological study; HDAVB = high-degree atrioventricular block; IHD = heart ischemic disease; LVEF = left ventricular ejection fraction, PPI = permanent pacemaker implantation; SEV = self-expandable valve; TAVR = Transcatheter aortic valve replacement.

* 2 patients from the immediate and 1 from the delayed LBBB groups, who died on days 0, 1 and 4 post TAVR (before 2 weeks post TAVR) were excluded from this analysis.
